# Supplementary material for: Mollusk allergy in shrimp-allergic patients: Still a complex diagnosis. An Italian real-life cross-sectional multicenter study
Source: PubMed Central journal article supplement — World Allergy Organ J. 2022 Sep 5;15(9):100685. doi: 10.1016/j.waojou.2022.100685 (PMC9468587; doi:10.1016/j.waojou.2022.100685), 2022-09-05
Supplement: mmc1.pdf [file mmc1.pdf]

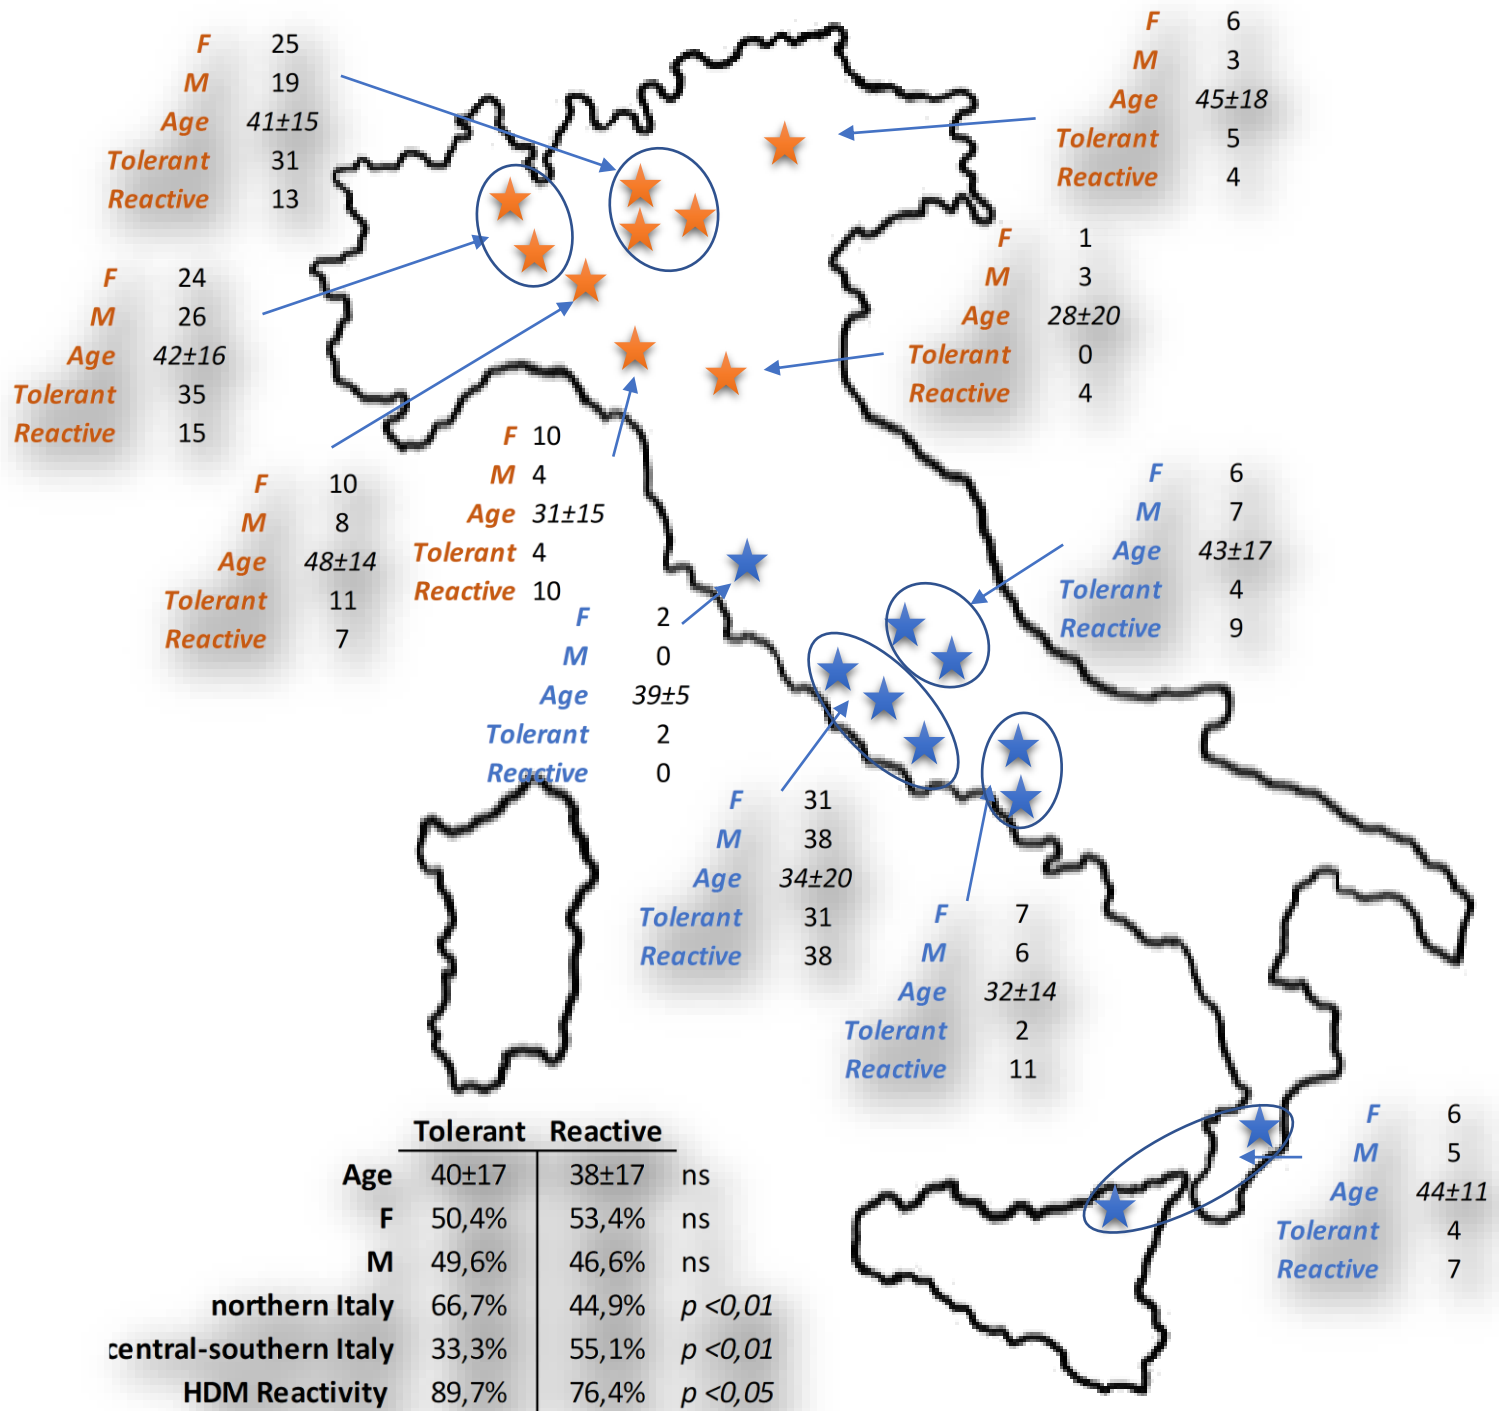

F 25  
M 19  
Age 41±15  
Tolerant 31  
Reactive 13

F 24  
M 26  
Age 42±16  
Tolerant 35  
Reactive 15

F 10  
M 8  
Age 48±14  
Tolerant 11  
Reactive 7

F 10  
M 4  
Age 31±15  
Tolerant 4  
Reactive 10

F 2  
M 0  
Age 39±5  
Tolerant 2  
Reactive 0

F 31  
M 38  
Age 34±20  
Tolerant 31  
Reactive 38

F 7  
M 6  
Age 32±14  
Tolerant 2  
Reactive 11

F 6  
M 3  
Age 45±18  
Tolerant 5  
Reactive 4

F 1  
M 3  
Age 28±20  
Tolerant 0  
Reactive 4

F 6  
M 7  
Age 43±17  
Tolerant 4  
Reactive 9

F 6  
M 5  
Age 44±11  
Tolerant 4  
Reactive 7
