# Supplementary material for: Mollusk allergy in shrimp-allergic patients: Still a complex diagnosis. An Italian real-life cross-sectional multicenter study
Source: PubMed Central journal article supplement — World Allergy Organ J. 2022 Sep 5;15(9):100685. doi: 10.1016/j.waojou.2022.100685 (PMC9468587; doi:10.1016/j.waojou.2022.100685), 2022-09-05
Supplement: mmc2.pdf [file mmc2.pdf]

Molecules belonging to crustaceans and / or molluscs from the database of the World Health Organization and International Union of Immunological Societies (WHO/IUIS) Allergen Nomenclature Sub-committee

| Species                            | Common Name                    | Allergen | Biochemical name                     | MW        |
|------------------------------------|--------------------------------|----------|--------------------------------------|-----------|
| <i>Archaeopotamobius sibiricus</i> | Crayfish                       | Arc s 8  | Triosephosphate isomerase            | ~28 kDa   |
| <i>Callinectes bellicosus</i>      | Warrior swimming brown crab    | Cal b 2  | Arginine kinase                      | 40 kDa    |
| <i>Charybdis feriatus</i>          | Crab                           | Cha f 1  | Tropomyosin                          | 34 kDa    |
| <i>Crangon crangon</i>             | North Sea shrimp               | Cra c 1  | Tropomyosin                          | ~38 kDa   |
|                                    |                                | Cra c 2  | Arginine kinase                      | ~45 kDa   |
|                                    |                                | Cra c 4  | Sarcoplasmic calcium-binding protein | ~25 kDa   |
|                                    |                                | Cra c 5  | Myosin, light chain 1                | ~17.5 kDa |
|                                    |                                | Cra c 6  | Troponin C                           | ~21 kDa   |
|                                    |                                | Cra c 8  | Triosephosphate isomerase            | ~28 kDa   |
| <i>Eriocheir sinensis</i>          | Chinese mitten crab            | Eri s 2  | ovary development-related protein    | 28.2 kDa  |
| <i>Exopalaemon modestus</i>        | White legged freshwater shrimp | Exo m 1  | Tropomyosin                          | 38 kDa    |
| <i>Homarus americanus</i>          | American lobster               | Hom a 1  | Tropomyosin                          | 34 kDa    |
|                                    |                                | Hom a 3  | Myosin light chain 2                 | ~23 kDa   |
|                                    |                                | Hom a 6  | Troponin C                           | ~20 kDa   |
| <i>Litopenaeus vannamei</i>        | White shrimp                   | Lit v 1  | Tropomyosin                          | 36 kDa    |
|                                    |                                | Lit v 2  | Arginine kinase                      | 40 kDa    |
|                                    |                                | Lit v 3  | Myosin, light chain 2                | 20 kDa    |
|                                    |                                | Lit v 4  | Sarcoplasmic calcium-binding protein | 20 kDa    |
|                                    |                                | Lit v 13 | Fatty Acid Binding Protein; FABP     | 15 kDa    |
| <i>Macrobrachium rosenbergii</i>   | giant freshwater prawn         | Mac r 1  | Tropomyosin                          | 37 kDa    |
|                                    |                                | Mac r 2  | Arginine Kinase                      | 40 kDa    |
| <i>Melicertus latisulcatus</i>     | King prawn                     | Mel l 1  | Tropomyosin                          | 38 kDa    |
| <i>Metapenaeus ensis</i>           | Shrimp                         | Met e 1  | Tropomyosin                          | 34 kDa    |
| <i>Pandalus borealis</i>           | Northern shrimp                | Pan b 1  | Tropomyosin                          | 37 kDa    |
| <i>Panulirus stimpsoni</i>         | Spiny lobster                  | Pan s 1  | Tropomyosin                          | 34 kDa    |
| <i>Penaeus aztecus</i>             | Brown shrimp                   | Pen a 1  | Tropomyosin                          | 36 kDa    |
| <i>Penaeus indicus</i>             | Shrimp                         | Pen i 1  | Tropomyosin                          | 34 kDa    |
| <i>Pontastacus leptodactylus</i>   | Narrow-clawed crayfish         | Pon l 4  | Sarcoplasmic calcium-binding protein | ~24 kDa   |
|                                    |                                | Pon l 7  | Troponin I                           | ~30 kDa   |

| Species                                    | Common Name           | Allergen | Biochemical name                     | MW       |
|--------------------------------------------|-----------------------|----------|--------------------------------------|----------|
| <i>Penaeus monodon</i>                     | Black tiger shrimp    | Pen m 1  | Tropomyosin                          | 38 kDa   |
|                                            |                       | Pen m 2  | Arginine kinase                      | 40 kDa   |
|                                            |                       | Pen m 3  | Myosin light chain 2                 | 20 kDa   |
|                                            |                       | Pen m 4  | Sarcoplasmic calcium binding protein | 20 kDa   |
|                                            |                       | Pen m 6  | Troponin C                           | 16.8 kDa |
|                                            |                       | Pen m 7  | Hemocyanin                           | 76 kDa   |
|                                            |                       | Pen m 8  | Triosephosphate Isomerase            | 27 kDa   |
|                                            |                       | Pen m 13 | Fatty Acid Binding Protein           | 20 kDa   |
|                                            |                       | Pen m 14 | Glycogen phosphorylase-like protein  | 95 kDa   |
| <i>Portunus pelagicus</i>                  | Blue swimmer crab     | Por p 1  | Tropomyosin                          | 39 kDa   |
| <i>Procambarus clarkii</i>                 | Red swamp crayfish    | Pro c 1  | Tropomyosin                          | 36 kDa   |
|                                            |                       | Pro c 2  | Arginine kinase                      | 40 kDa   |
|                                            |                       | Pro c 5  | Myosin light chain 1                 | 18 kDa   |
|                                            |                       | Pro c 8  | Triosephosphate isomerase            | 28 kDa   |
| <i>Scylla paramamosain</i>                 | Mud crab              | Scy p 1  | Tropomyosin                          | 38 kDa   |
|                                            |                       | Scy p 2  | Arginine kinase                      | 40 kDa   |
|                                            |                       | Scy p 3  | Myosin light chain                   | 18 kDa   |
|                                            |                       | Scy p 4  | Sarcoplasmic Ca+ binding protein     | 20 kDa   |
|                                            |                       | Scy p 8  | Triosephosphate isomerase            | 28 kDa   |
|                                            |                       | Scy p 9  | Filamin C                            | 90 kDa   |
| <b>Animalia Mollusca</b>                   |                       |          |                                      |          |
| <i>Crassostrea angulata</i>                | Pacific oyster        | Cra a 2  | Arginine kinase                      | 20 kDa   |
|                                            |                       | Cra a 4  | Sarcoplasmic calcium binding protein | 20 kDa   |
| <i>Crassostrea gigas</i>                   | Pacific oyster        | Cra g 1  | Tropomyosin                          | 38 kDa   |
| <i>Haliotis laevigata x Haliotis rubra</i> | Jade tiger abalone    | Hal l 1  | Tropomyosin                          | 33.4 kDa |
| <i>Haliotis midae</i>                      | Perlemoen abalone     | Hal m 1  | Unknown                              | 49 kDa   |
| <i>Helix aspersa [Cornu aspersum]</i>      | Brown garden snail    | Hel as 1 | Tropomyosin                          | 36 kDa   |
| <i>Rapana venosa</i>                       | Veined rapa whelk     | Rap v 2  | Paramyosin                           | 99 kDa   |
| <i>Saccostrea glomerata</i>                | Sydney rock oyster    | Sac g 1  | Tropomyosin                          | 38 kDa   |
| <i>Todarodes pacificus</i>                 | Japanese flying squid | Tod p 1  | Tropomyosin                          | 38 kDa   |

MW: Molecular weight
